# Supplementary material for: New Fe-doped two-dimensional BiVO4 nanosheets for direct methane conversion to methyl oxygenates
Source: Royal Society of Chemistry journal article supplement (doi:10.1039/d4ma00069b), 2024-01-01
Supplement: d4ma00069b1.pdf [file d4ma00069b1.pdf]

**New Fe-Doped Two-dimensional BiVO<sub>4</sub> Nanosheets for Direct Methane Conversion to Methyl Oxygenates**

Catherine Afriyie<sup>a, b, \*</sup>, Xingwang Zhang<sup>a</sup>

<sup>a</sup> College of Chemical and Biological Engineering, Zhejiang University, Hangzhou 310027, China.

<sup>b</sup> Department of Chemical Engineering, Kwame Nkrumah University of Science and Technology, Kumasi, Ghana.

E-mail addresses: 22028182@zju.edu.cn, xwzhang@zju.edu.cn

\*Corresponding author: 22028182@zju.edu.cn (Catherine Afriyie)

*Preparation of BiVO<sub>4</sub> microcrystals*

The BiVO<sub>4</sub> microcrystals was prepared by dissolving 3.0 mmol Bi(NO<sub>3</sub>)<sub>3</sub>·5H<sub>2</sub>O in a 20 mL aqueous solution of 2 M HNO<sub>3</sub> and the resultant solution was denoted as A. 3.0 mmol NH<sub>4</sub>VO<sub>3</sub> in a 20 mL aqueous solution of 2 M HNO<sub>3</sub> the resultant yellow solution was denoted as solution B. 3 mmol C<sub>18</sub>H<sub>29</sub>NaO<sub>3</sub>S (SDBS) in a 20 mL aqueous solution of 2 M HNO<sub>3</sub> and the resultant solution was denoted as solution C. Then, solutions A, B and C were mixed together to form a translucent, yellow solution under vigorous stirring. The pH of the combined solution was adjusted to an acid concentration of 1 M by adding deionized water to prevent the salts from precipitating, and stirred continuously for 2 h. The translucent solution was poured into three different 50 mL Teflon-lined stainless-steel autoclaves until 80% of the volume of each autoclave was occupied. The Teflon-lined stainless-steel autoclaves were sealed and heated in an oven at 150 °C for 5 h. After the hydrothermal treatment, the autoclaves were cooled naturally to room temperature. After cooling, each sample was transferred to a centrifuge tube, centrifuged at 10000 rpm for 5 min during each centrifuging cycle by washing with deionized water for three times and once with absolute ethanol. The vivid yellow precipitate obtained was dried in vacuum at 40 °C overnight and calcined at 250 °C for 2 h before collecting the yellow powder for activity test.

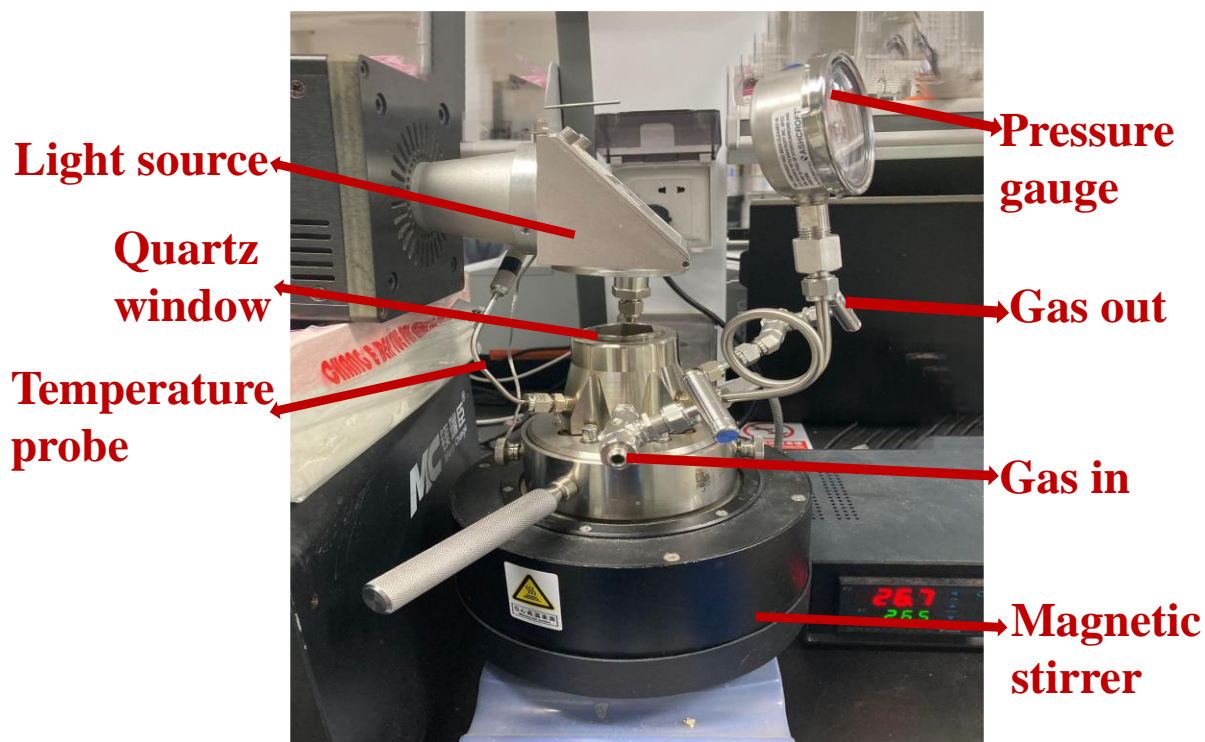

**Fig. S1.** Batch-type photoreactor experimental set-up

*Crystalline structure of BiVO<sub>4</sub> microcrystals*

Fig. S2 presents the typical XRD pattern of the BiVO<sub>4</sub> microcrystals, which can be indexed well with the pure phase of monoclinic scheelite BiVO<sub>4</sub> (JCPDC card No. 14-0688). Also, the peak splitting around 19° and 35° of the 2θ angles, magnified in the insets gives clear evidence to differentiate the monoclinic phase of the synthesized product from the tetragonal structure (JCPDS No. 14-0133).

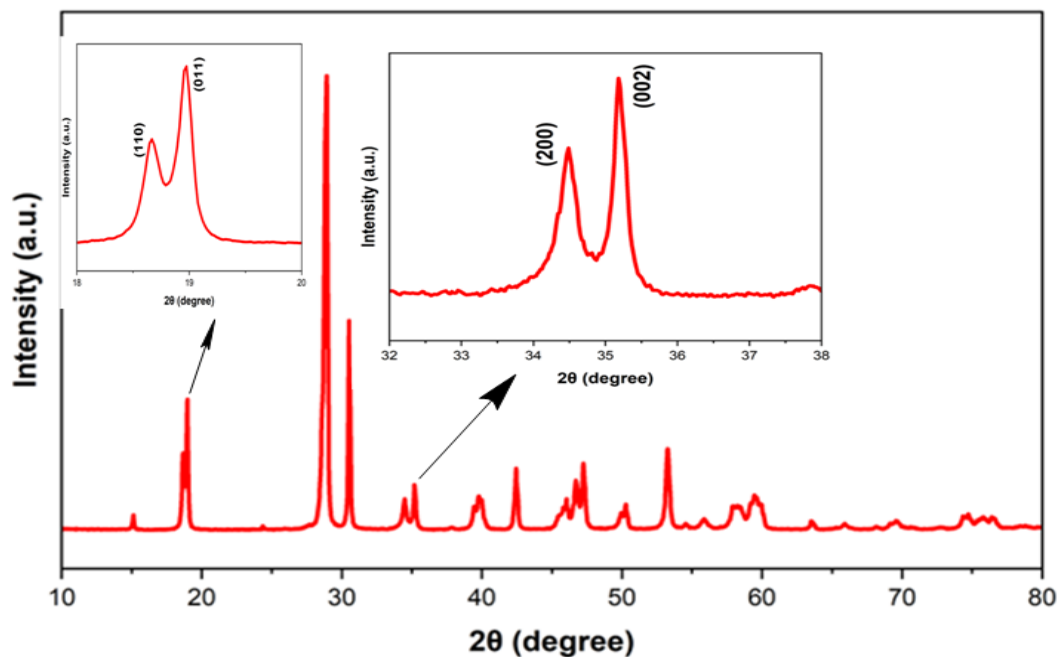

**Fig. S2.** XRD patterns of BiVO<sub>4</sub> microcrystal. Insets are the enlarged views of peaks around  $2\theta = 19^\circ$  and  $35^\circ$ .

*Photocatalytic performance evaluation*

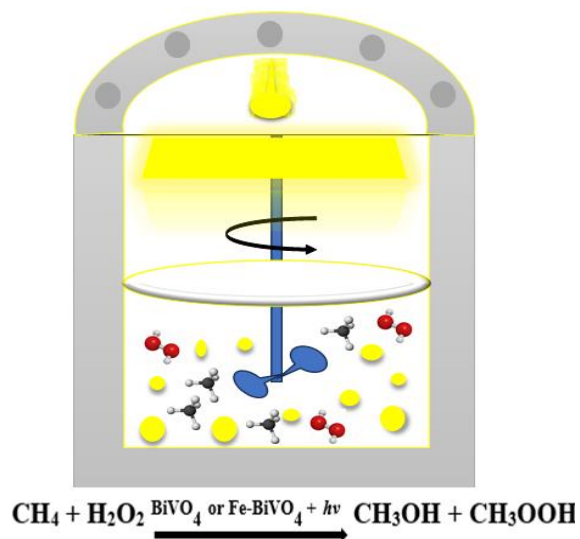

**Fig. S3.** Schematic illustration of the reaction inside the batch-type reactor vessel.

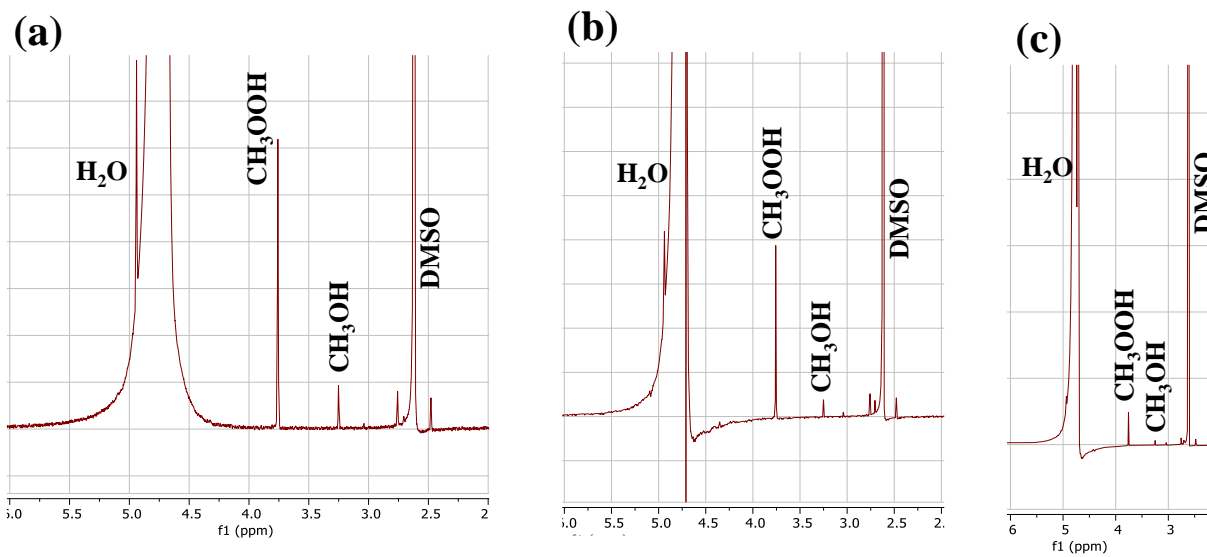

**Fig. S4.** Representative  $^1\text{H}$ -NMR spectra collected for the methane oxidation products using 100  $\mu\text{L}$   $\text{H}_2\text{O}_2$  as the oxidant under 2 h of light irradiation at 40  $^\circ\text{C}$  for (a) 1.0-Fe- $\text{BiVO}_4$  and (b) undoped  $\text{BiVO}_4$ ; (c) control experiment without light irradiation.

**Table S.1** Summary from literature of the photocatalytic conversion of CH<sub>4</sub> to primary oxygenated products in BiVO<sub>4</sub> and other photocatalyst systems in comparison to this work.

| Ref. #    | Catalyst                                             | Oxidant                                         | Gas                                   | Reaction temperature (°C) | Reaction time (min) | Light source                   | Primary oxygenated products selectivity/% | Primary oxygenated products productivity/ $\mu\text{molg}^{-1}\text{h}^{-1}$ |
|-----------|------------------------------------------------------|-------------------------------------------------|---------------------------------------|---------------------------|---------------------|--------------------------------|-------------------------------------------|------------------------------------------------------------------------------|
| This work | <b>Fe-BiVO<sub>4</sub> nanosheets</b>                | 100 $\mu\text{L}$ H <sub>2</sub> O <sub>2</sub> | CH <sub>4</sub>                       | 40                        | 120                 | Visible light ( $\geq$ 420 nm) | 100                                       | 217.6                                                                        |
|           | <b>BiVO<sub>4</sub> nanosheets</b>                   | 100 $\mu\text{L}$ H <sub>2</sub> O <sub>2</sub> | CH <sub>4</sub>                       | 40                        | 120                 | Visible light ( $\geq$ 420 nm) | 100                                       | 149.6                                                                        |
| [1]       | <b>WO<sub>3</sub> flowers</b>                        | 2 mM H <sub>2</sub> O <sub>2</sub>              | 20% CH <sub>4</sub> in N <sub>2</sub> | 50                        | 120                 | UV-light                       | -                                         | 38.17 $\pm$ 3.24                                                             |
| [2]       | <b>q-BiVO<sub>4</sub> nanoparticles</b>              | O <sub>2</sub>                                  | CH <sub>4</sub>                       | 25                        | 180                 | Visible light (400–780 nm)     | 96.6                                      | 366.67                                                                       |
| [3]       | <b>FeOOH/m-WO<sub>3</sub></b>                        | 1.5 mM H <sub>2</sub> O <sub>2</sub>            | 10% CH <sub>4</sub> in N <sub>2</sub> | 25 $\pm$ 1                | 240                 | visible-light (420–780 nm)     | 91.0                                      | 211.2                                                                        |
| [4]       | <b>Bipyramid BiVO<sub>4</sub> microcrystals</b>      | H <sub>2</sub> O                                | 10% CH <sub>4</sub> in Ar             | 65                        | 60                  | Visible light (350–800 nm)     | 85.0                                      | 111.9                                                                        |
|           | <b>Thick platelet BiVO<sub>4</sub> microcrystals</b> | H <sub>2</sub> O                                | 10% CH <sub>4</sub> in Ar             | 65                        | 60                  | Visible light (350–800 nm)     | 85.7                                      | 79.2                                                                         |

## Electronic Supplementary Information

|     |                                                                          |                                         |                                 |    |     |                                       |      |      |
|-----|--------------------------------------------------------------------------|-----------------------------------------|---------------------------------|----|-----|---------------------------------------|------|------|
|     | <b>Thin platelet<br/>BiVO<sub>4</sub><br/>microcrystals</b>              | H <sub>2</sub> O                        | 10%<br>CH <sub>4</sub> in<br>Ar | 65 | 60  | Visible<br>light<br>(350–<br>800 nm)  | 58.2 | 65.7 |
| [5] | <b>FeOx/TiO<sub>2</sub></b>                                              | 2 mM<br>H <sub>2</sub> O <sub>2</sub>   | 20%<br>CH <sub>4</sub> in<br>Ar | 25 | 180 | (≤710<br>nm)                          | ≥90  | 352  |
| [6] | <b>BiVO<sub>4</sub> + V<sub>2</sub>O<sub>5</sub><br/>on beta zeolite</b> | H <sub>2</sub> O                        | 20%<br>CH <sub>4</sub> in<br>He | 70 | 120 | 450 W<br>Hg lamp                      | 6.4  | 10.7 |
|     | <b>BiVO<sub>4</sub> + V<sub>2</sub>O<sub>5</sub><br/>on beta zeolite</b> | H <sub>2</sub> O                        | 20%<br>CH <sub>4</sub> in<br>He | 70 | 120 | 450 W<br>Hg lamp<br>+ Pyrex<br>filter | 100  | 3.3  |
| [7] | <b>BiVO<sub>4</sub> thick<br/>platelets</b>                              | H <sub>2</sub> O +<br>NaNO <sub>2</sub> | 20%<br>CH <sub>4</sub> in<br>He | 55 | 90  | 450 W<br>Hg-lamp                      | ≥90  | 11   |
|     | <b>BiVO<sub>4</sub> thick<br/>platelets</b>                              | H <sub>2</sub> O                        | 20%<br>CH <sub>4</sub> in<br>He | 55 | 90  | 450 W<br>Hg-lamp                      | 42.0 | 19.9 |
| [8] | <b>Bi<sub>2</sub>WO<sub>6</sub><br/>flowers</b>                          | H <sub>2</sub> O                        | 20%<br>CH <sub>4</sub> in<br>He | 55 | 120 | 450 W<br>Hg-lamp                      | 29.3 | 15.6 |
|     | <b>Bi<sub>2</sub>WO<sub>6</sub>/TiO<sub>2</sub><br/>composite</b>        | O <sub>2</sub>                          | 20%<br>CH <sub>4</sub> in<br>He | 55 | 120 | 450 W<br>Hg-lamp                      | 7.9  | 10.8 |
|     | <b>BiVO<sub>4</sub> thick<br/>platelets</b>                              | H <sub>2</sub> O                        | 20%<br>CH <sub>4</sub> in<br>He | 55 | 120 | 450 W<br>Hg-lamp                      | 51.0 | 20.8 |

**References**

- [1] D. Premachandra, M.D. Heagy. *Methane* 2 (2023) 103–112.
- [2] Y. Fan, W. Zhou, X. Qiu, et al., *Nature Sustainability* 4 (2021) 509–515.
- [3] J. Yang, J. Hao, J. Wei, et al., *Fuel* 266 (2020) 117104.
- [4] W. Zhu, M. Shen, G. Fan, et al., *ACS Appl. Nano Mater.* 1 12 (2018) 6683–6691.
- [5] J. Xie, R. Jin, A. Li, et al., *Nature Catalysis* 1 (2018) 889–896.
- [6] S. Murcia-López, M.C. Bacariza, K. Villa, et al., *ACS Catalysis* 7 (2017) 2878-2885.
- [7] S. Murcia-López, K. Villa, T. Andreu, et al., *Chemical Communications* 51 (2015) 7249-7252.
- [8] S. Murcia-López, K. Villa, T. Andreu, et al., *ACS Catalysis* 4 (2014) 3013-3019.
